# Supplementary material
Source: MDPI journal article supplement (https://www.mdpi.com/search?q=fibers-06-00022)
Supplement: s001 [file fibers-06-00022-s001.pdf]

## Supporting Information

### **Facile Synthesis of Highly Hydrophobic Cellulose Nanoparticles through Post-esterification Microfluidization**

Chunxiang Lin<sup>1,2</sup>, Qianli Ma<sup>2</sup>, Qiaoquan Su<sup>1</sup>, Huiyang Bian<sup>2</sup>, J.Y. Zhu<sup>\*2</sup>

<sup>1</sup> College of Environment & Resources, Fuzhou University, Fuzhou 350108, P. R. China

<sup>2</sup> Forest Products Laboratory, U.S. Forest Service, U.S. Department of Agriculture, Madison, WI 53726, USA.

\* Corresponding author: [jzhu@fs.fed.us](mailto:jzhu@fs.fed.us); Tel: +1-(608) 231-9520

---

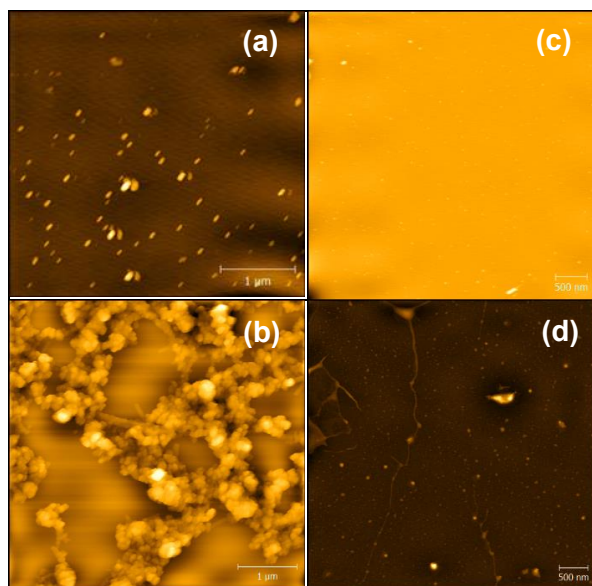

Fig. S1 AFM images of post esterification fibrillated (PeM) cellulose nanomaterials (CNP). (a) CNP-S10T80t1; (b) CNP-S05T80t2; (c) CNP-N10T80t1; (d) CNP-N10T60t2.

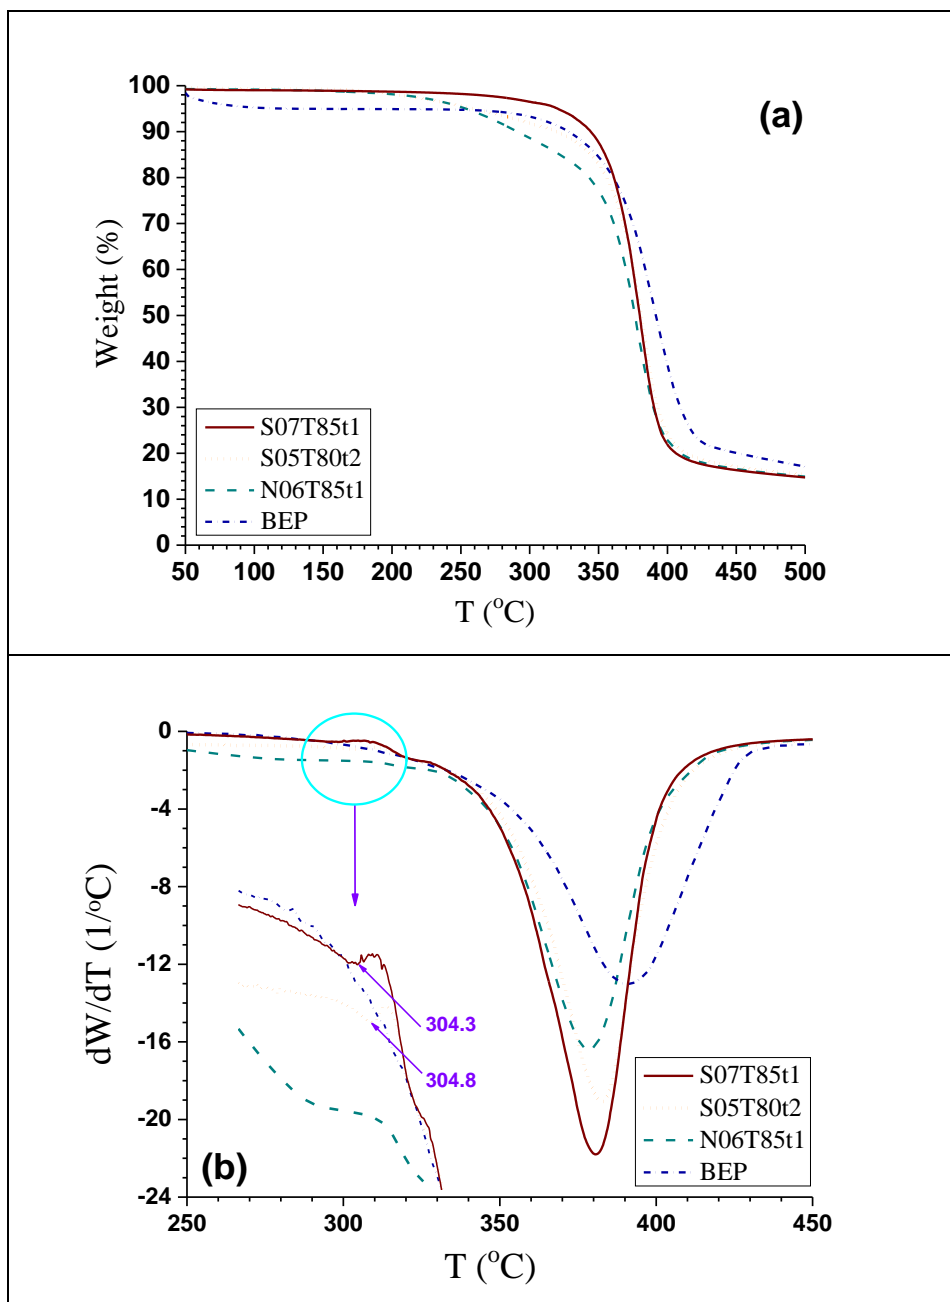

Fig. S2 Thermal stability of BEP and PeM-CNP samples. (a) weight loss; (b) derivative weight loss.

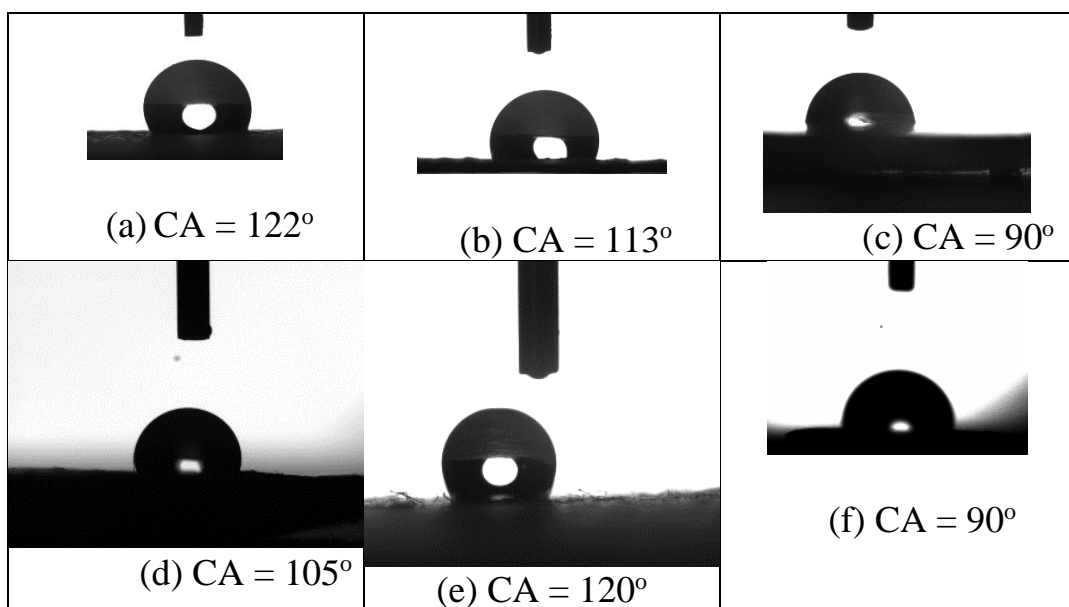

Fig. S3 Water contact angle on surface of PeM-CNP pellets: (a) S10T80t1; (b) S07T85t1; (c) S05T80t2; (d) N10T80t1; (e) N10T60t2; (f) N06T85t1.

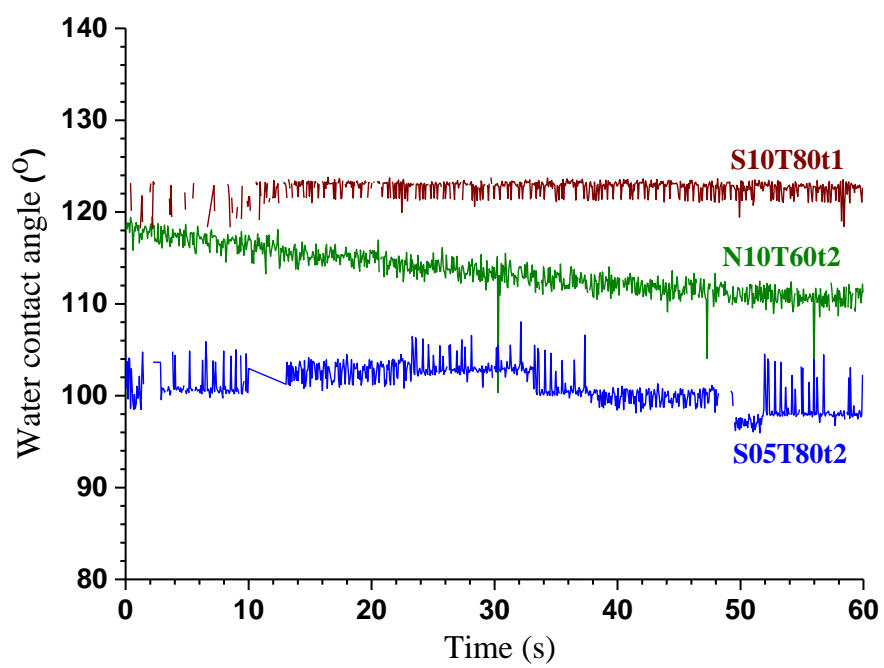

Fig. S4 Time-dependent water contact angle on PeM-CNP samples
